# Supplementary material for: Epidemiology, clinical characteristics, and outcome of candidemia in critically ill patients in Germany: a single-center retrospective 10-year analysis
Source: Springer Nature journal article supplement (doi:10.1186/s13613-020-00755-8), 2020-10-16

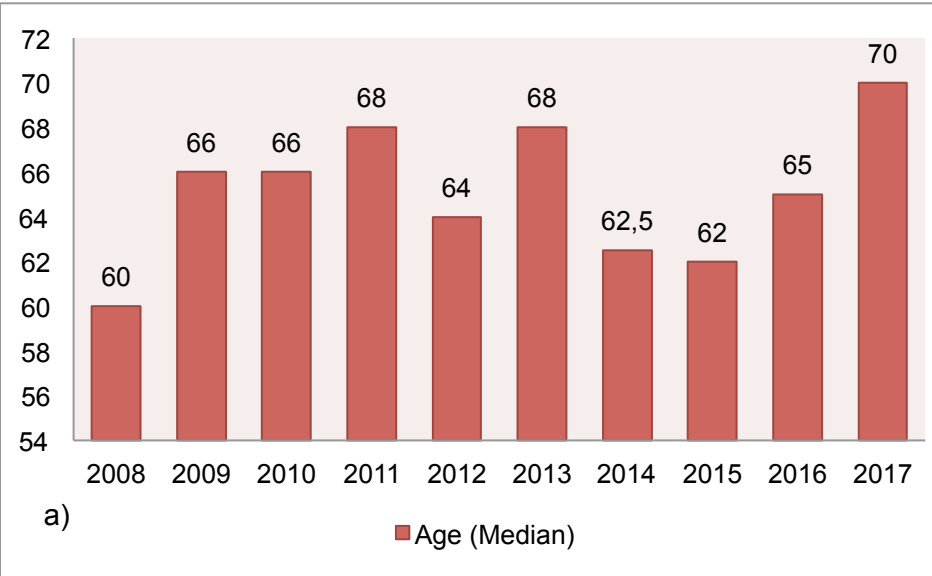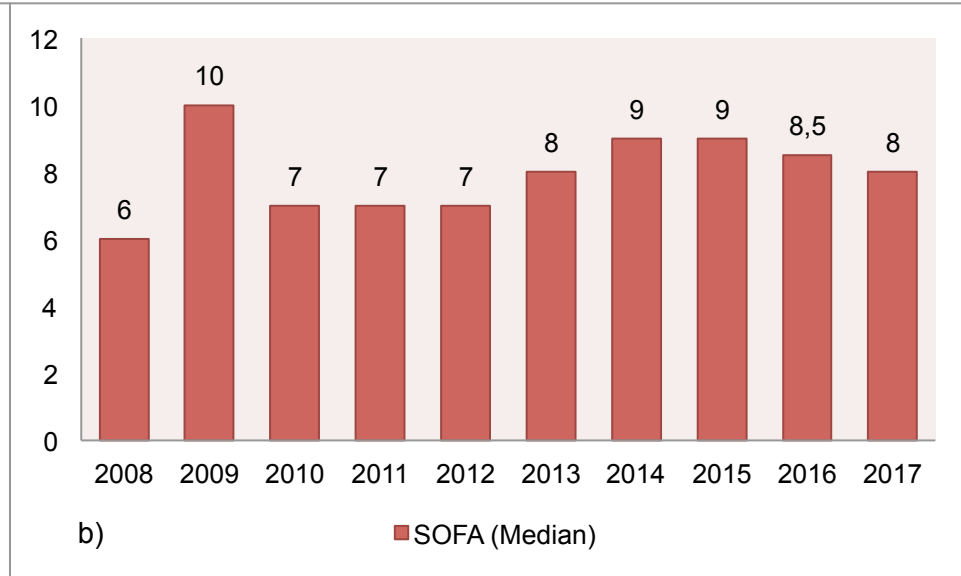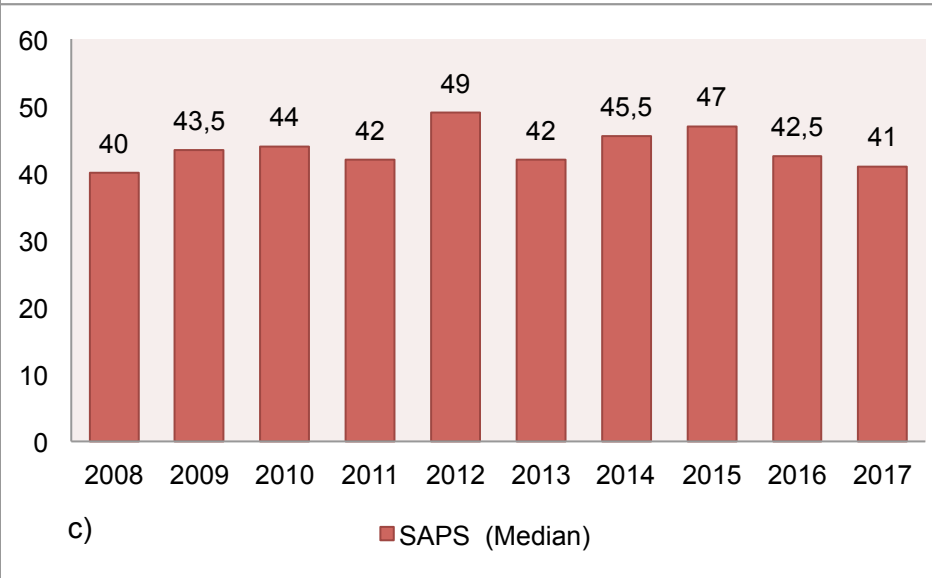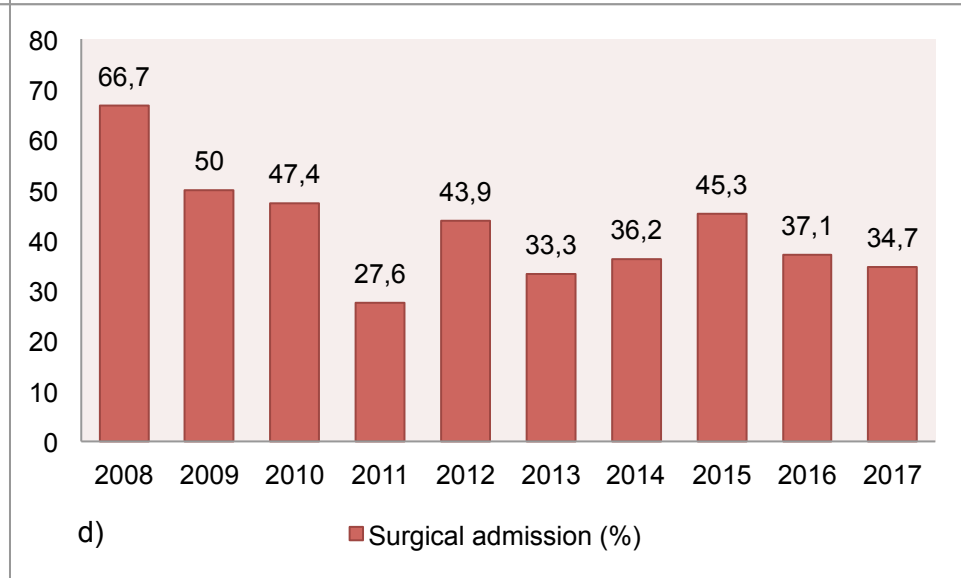

Supplement: MOESM1 [file 18493182]
