# Supplementary material for: Epidemiology, clinical characteristics, and outcome of candidemia in critically ill patients in Germany: a single-center retrospective 10-year analysis
Source: Springer Nature journal article supplement (doi:10.1186/s13613-020-00755-8), 2020-10-16
Supplement: MOESM2 [file 18493182]

|                                                      | Study participants<br>n = 391 | Non-survivors<br>n = 234 | Survivors<br>n = 157 | Descriptive p-value<br>(unadjusted) <sup>a</sup> |
|------------------------------------------------------|-------------------------------|--------------------------|----------------------|--------------------------------------------------|
| <b>Co-managing specialty</b>                         |                               |                          |                      | 0.153                                            |
| Visceral Surgery                                     | 121 (31)                      | 69 (30)                  | 52 (33)              |                                                  |
| Gastroenterology and Hepatology                      | 63 (16)                       | 47 (20)                  | 16 (10)              |                                                  |
| Cardiology                                           | 35 (9)                        | 21 (9)                   | 14 (9)               |                                                  |
| Pneumology                                           | 32 (8)                        | 20 (9)                   | 12 (8)               |                                                  |
| Cardiovascular Surgery                               | 21 (5)                        | 13 (6)                   | 8 (5)                |                                                  |
| Trauma and Orthopedic Surgery                        | 20 (5)                        | 10 (4)                   | 10 (6)               |                                                  |
| Oncology, Hematology and Bone Marrow Transplantation | 19 (5)                        | 14 (6)                   | 5 (3)                |                                                  |
| Vascular Medicine                                    | 14 (4)                        | 8 (3)                    | 6 (4)                |                                                  |
| Nephrology                                           | 13 (3)                        | 5 (2)                    | 8 (5)                |                                                  |
| Visceral Transplant Surgery                          | 12 (3)                        | 7 (3)                    | 5 (3)                |                                                  |
| Neurology                                            | 10 (3)                        | 6 (3)                    | 4 (3)                |                                                  |
| Neurosurgery                                         | 9 (2)                         | 3 (1)                    | 6 (4)                |                                                  |
| Urology                                              | 9 (2)                         | 3 (1)                    | 6 (4)                |                                                  |
| Otorhinolaryngology                                  | 6 (2)                         | 2 (1)                    | 4 (3)                |                                                  |
| Gynecology                                           | 4 (1)                         | 3 (1)                    | 1 (1)                |                                                  |
| Dermatology                                          | 3 (1)                         | 3 (1)                    | 0 (0)                |                                                  |
| <b>Surgical vs. medical admission</b>                |                               |                          |                      | 0.019                                            |
| Surgery                                              | 216 (55)                      | 118 (50)                 | 98 (62)              |                                                  |
| Conservative medicine                                | 175 (45)                      | 116 (50)                 | 59 (38)              |                                                  |
