# Supplementary material for: Epidemiology, clinical characteristics, and outcome of candidemia in critically ill patients in Germany: a single-center retrospective 10-year analysis
Source: Springer Nature journal article supplement (doi:10.1186/s13613-020-00755-8), 2020-10-16

### ***Candida* spp. in BSI patients n = 391**

▣ Survivors n = 157   ▣ Non-Survivors n = 234

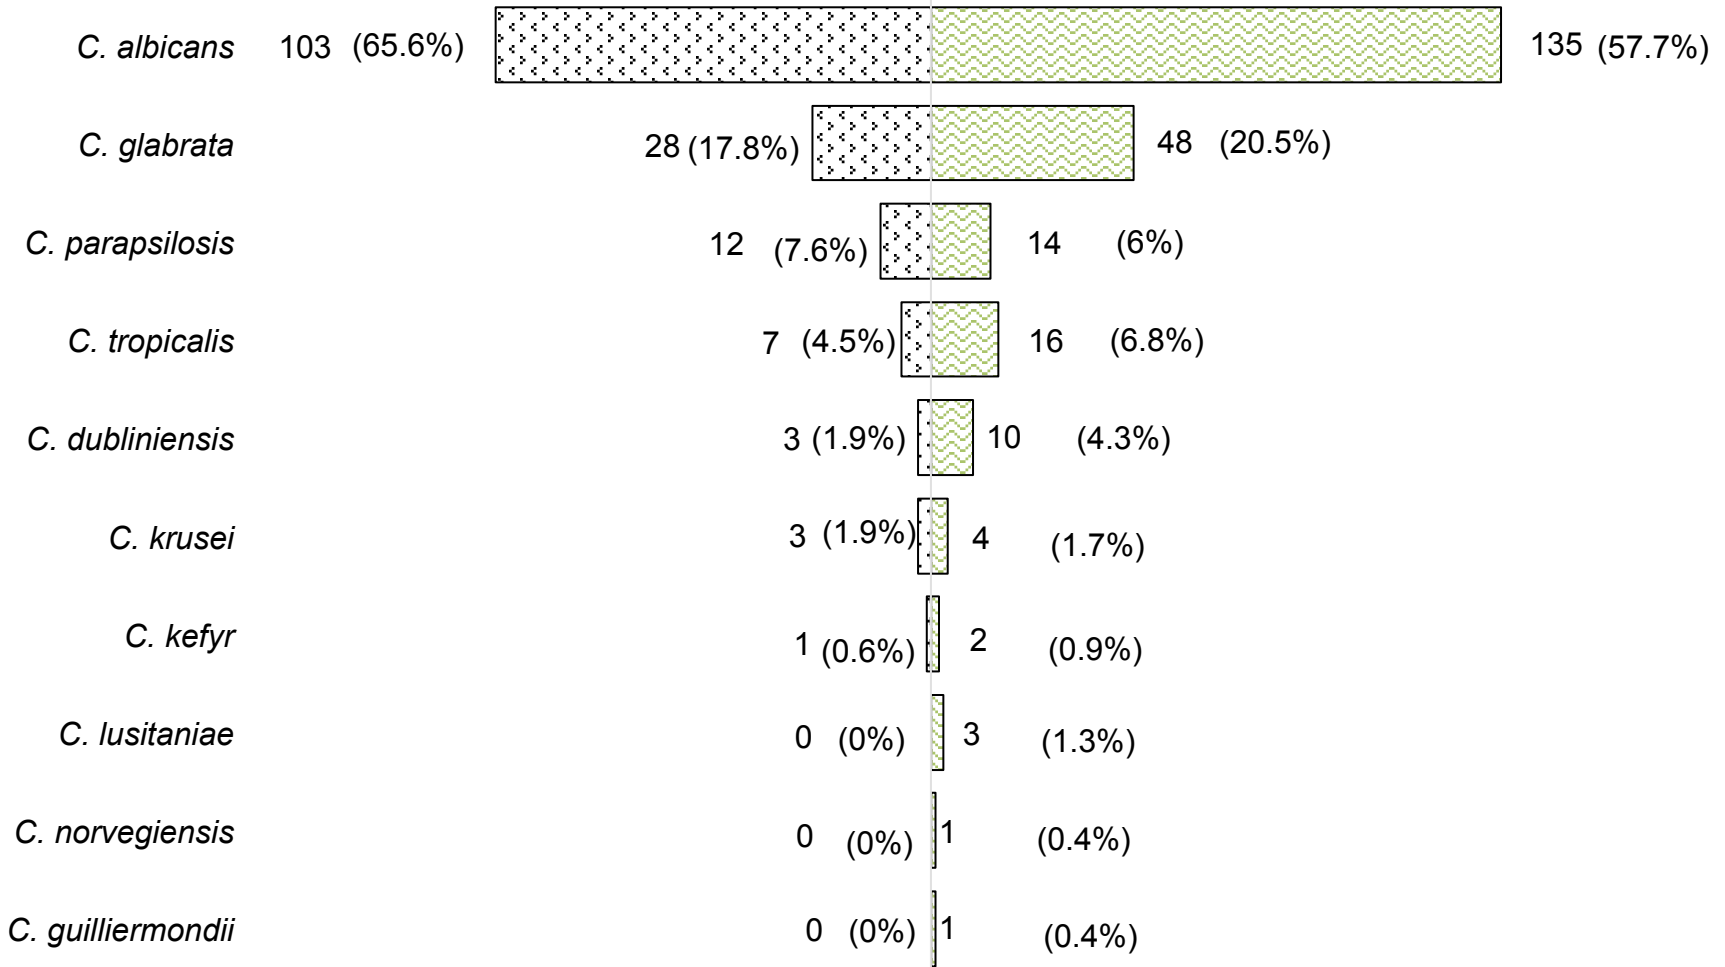

Supplement: MOESM3 [file 18493182]
