# Supplementary material for: Epidemiology, clinical characteristics, and outcome of candidemia in critically ill patients in Germany: a single-center retrospective 10-year analysis
Source: Springer Nature journal article supplement (doi:10.1186/s13613-020-00755-8), 2020-10-16

## Factors associated with mortality 180 days after *Candida* BSI

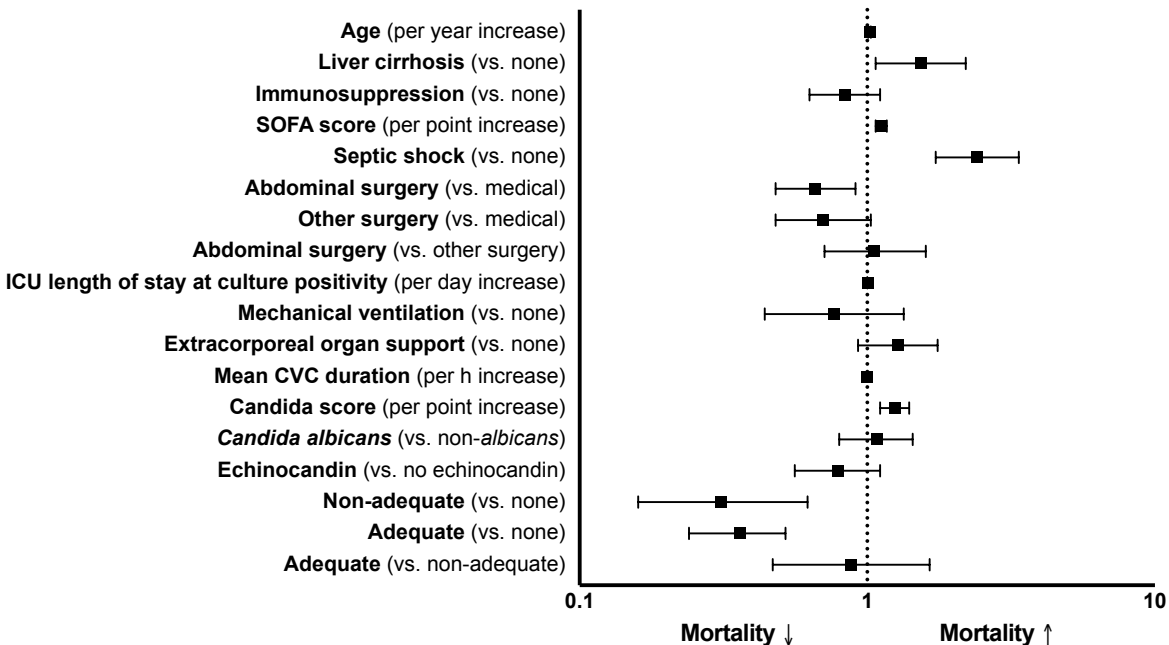

Supplement: MOESM5 [file 18493182]
